# Supplementary material for: Elongator Subunit 3 (Elp3) Is Required for Zebrafish Trunk Development
Source: PubMed Central journal article supplement (PMC7036906; doi:10.3390/ijms21030925), 2020-01-31
Supplement: ijms-21-00925-s001.pdf [file ijms-21-00925-s001.pdf]

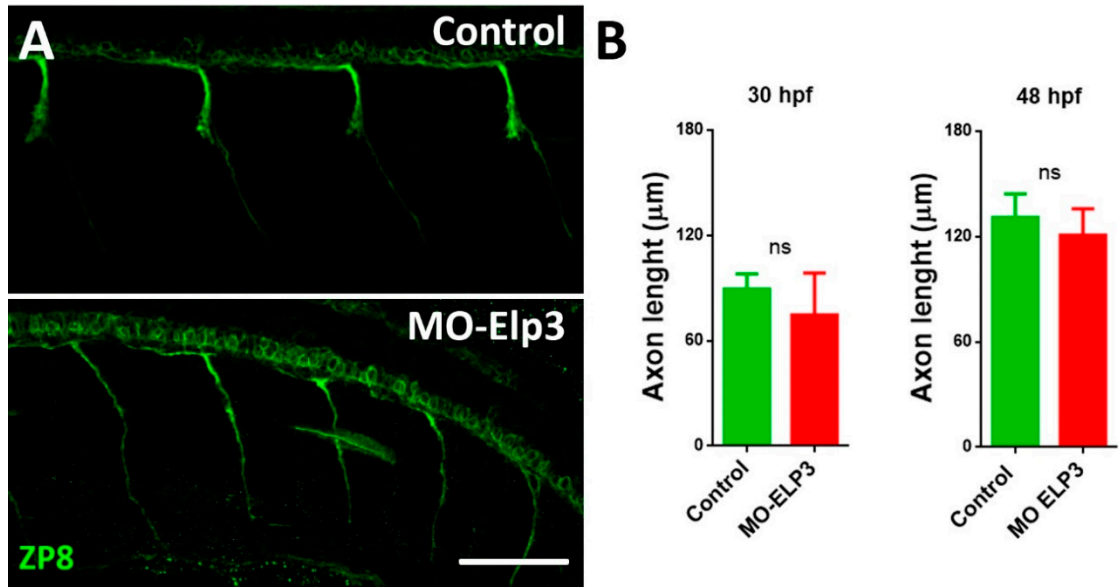

**Supplementary Figure S1.** Motor neuron axon length is not affected by Elp3 knock down. (A) Representative confocal images of motor neuron, stained with ZN8 (CD166 antigen homolog A, Neurolin) 48 hpf of control and morphant embryos (Bar 20  $\mu\text{m}$ ). (B) Quantification of axonal length at 30 and 48 hpf of control and morphant embryos ( $N = 3$ ,  $n = 10$ , per embryo).
